# Supplementary material for: H2S preconditioning induces long-lived perturbations in O2 metabolism
Source: PubMed Central journal article supplement — Proc Natl Acad Sci U S A. 2024 Mar 13;121(12):e2319473121. doi: 10.1073/pnas.2319473121 (PMC10962982; doi:10.1073/pnas.2319473121), 2024-03-13
Supplement: pnas.2319473121.sapp.pdf [file pnas.2319473121.sapp.pdf]

## Supplementary Information

### **H<sub>2</sub>S preconditioning induces long-lived perturbations in O<sub>2</sub> metabolism**

David A. Hanna<sup>1</sup>, Jutta Diessl<sup>1</sup>, Arkajit Guha<sup>1</sup>, Roshan Kumar<sup>1</sup>, Anthony Andren<sup>2</sup>, Costas Lyssiotis<sup>2,3,4</sup> and Ruma Banerjee\*

Departments of <sup>1</sup>Biological Chemistry, <sup>2</sup>Molecular and Integrative Physiology, <sup>3</sup>Internal Medicine, <sup>4</sup>Rogel Cancer Center, University of Michigan Medical Center,  
Ann Arbor, MI 48109-0600

\*Corresponding Author: Ruma Banerjee, 4220C MSRB III, 1150 W. Medical Center Dr., University of Michigan, Ann Arbor, MI 48109-0600, email address: [rbanerje@umich.edu](mailto:rbanerje@umich.edu)

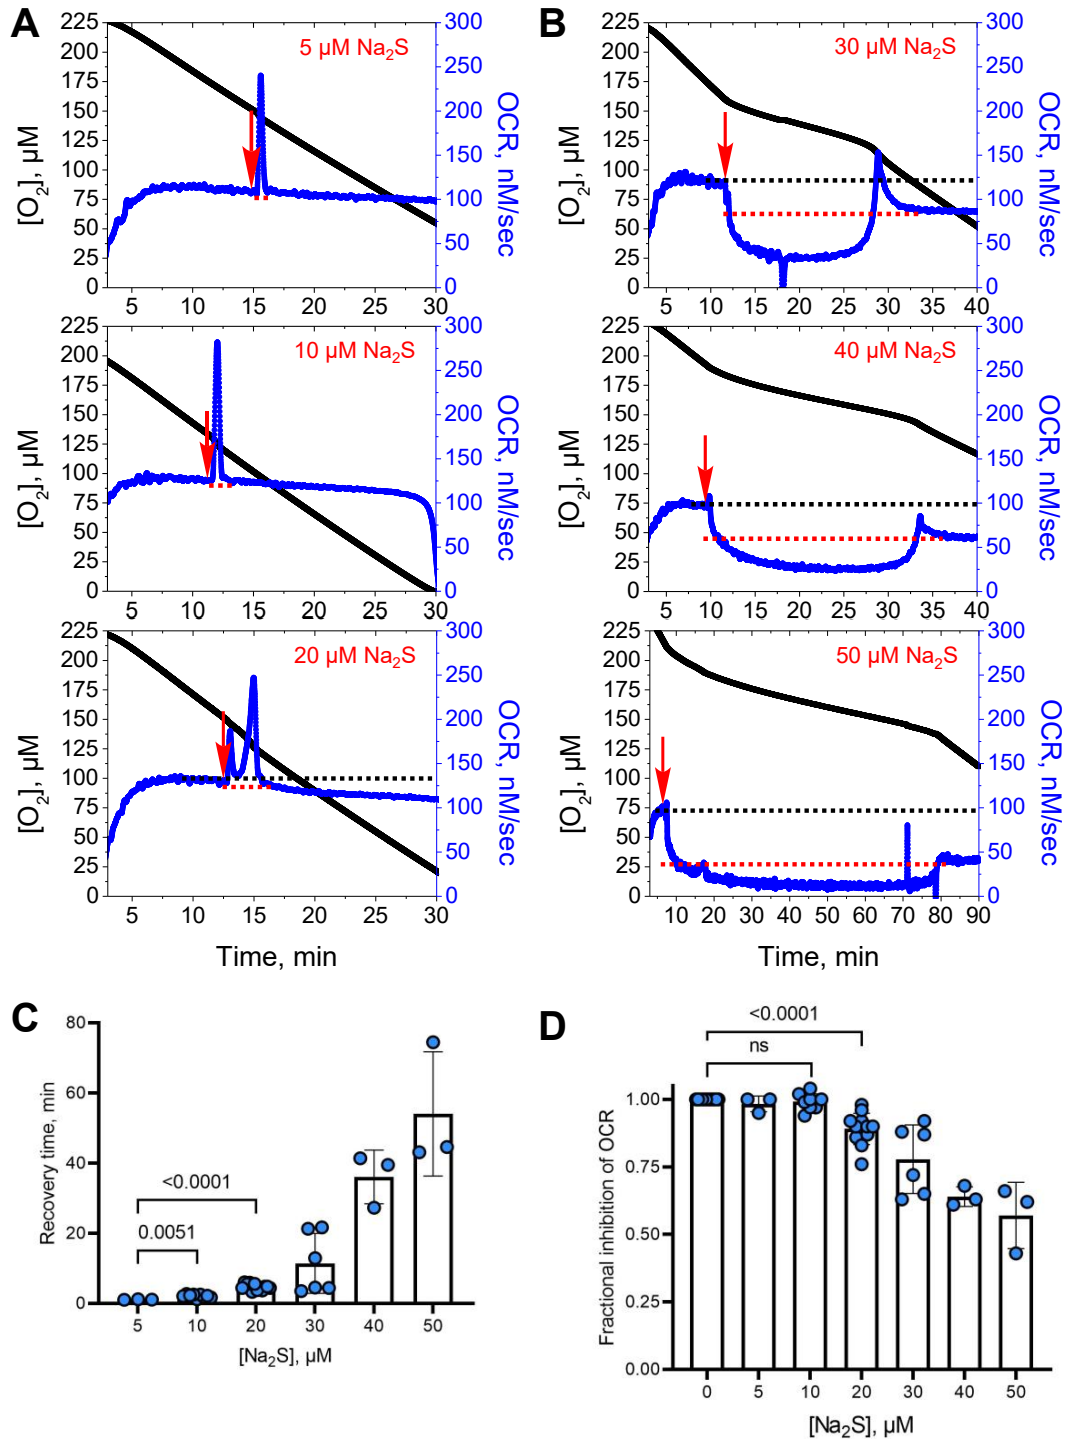

**Figure S1. Dose-dependent changes in oxygen consumption kinetics are elicited by  $\text{H}_2\text{S}$ .** **A, B.** HT29 cells exhibit changes in OCR in response to  $\text{Na}_2\text{S}$  (5–50  $\mu\text{M}$ , red arrow). The black dotted line denotes the basal OCR while the red dotted line indicates the time between sulfide exposure and establishment of a new stationary OCR. **C, D.** Quantitative analysis of data in A, B showing the correlation between  $\text{Na}_2\text{S}$  dose and recovery time (C), or fractional inhibition of OCR (D). Data are either representative or show mean  $\pm$  SD of at least 3 independent measurements. Two-sample unpaired  $t$  test was performed for statistical analysis.

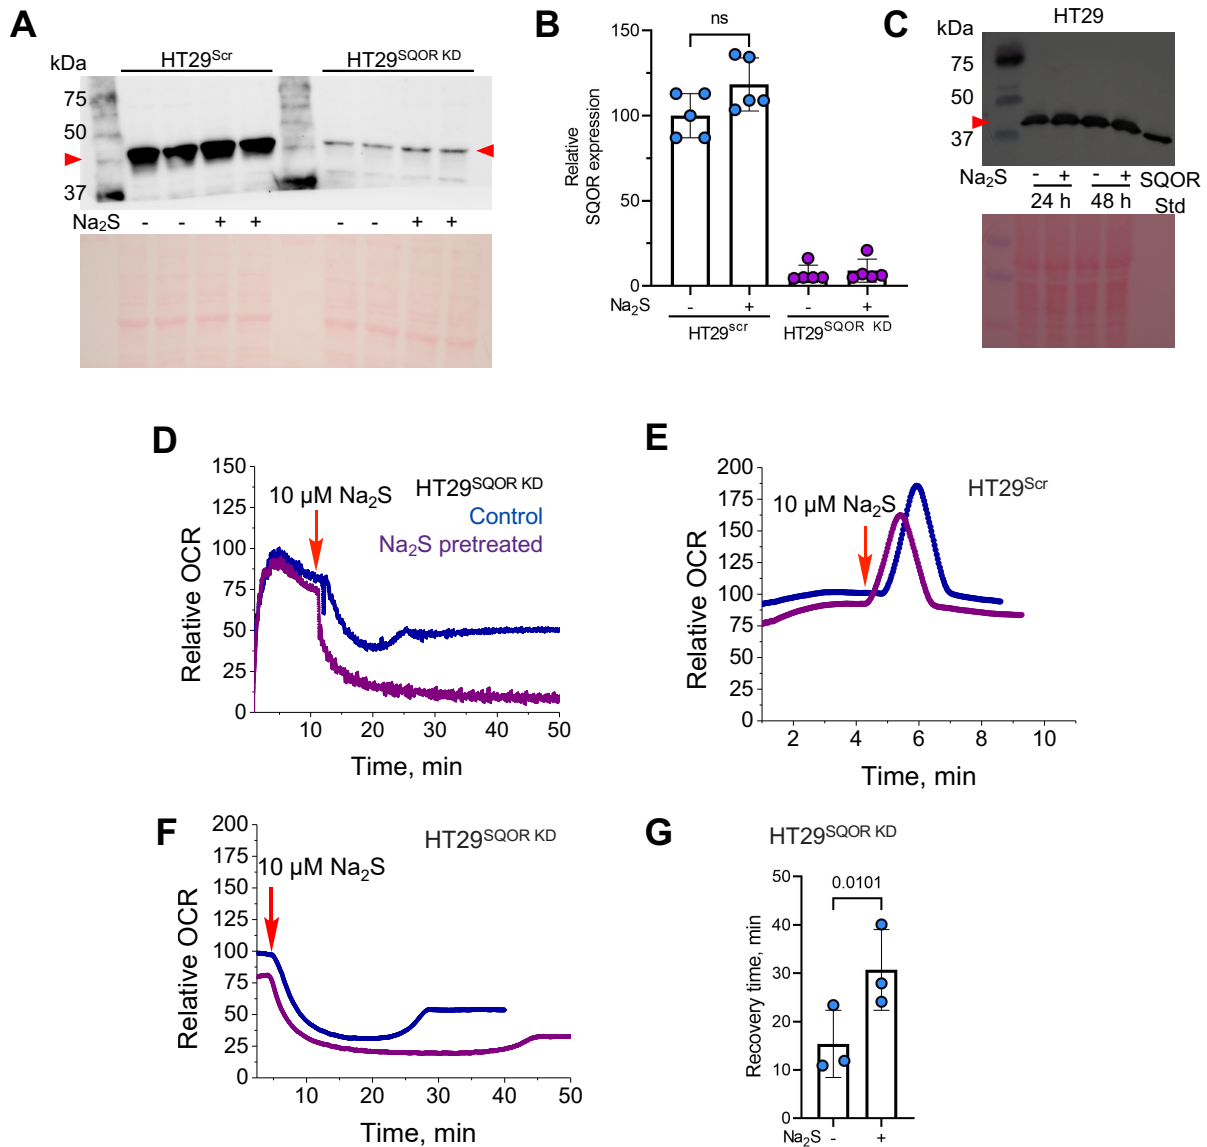

**Figure S2. H<sub>2</sub>S memory is enhanced by SQOR knockdown.** **A-C.** Western blot analysis showing that SQOR protein levels (red arrowheads) are not affected by sulfide pretreatment (100  $\mu$ M Na<sub>2</sub>S) in HT29<sup>Scr</sup> or HT29<sup>SQOR KD</sup> cells after 4 h (A-B), or in HT29 cells after 24-48 h (C). The lower panels show Ponceau S staining of the membranes as equal loading controls. **D.** Compared to untreated controls (blue), Na<sub>2</sub>S (50  $\mu$ M, 4 h) pretreatment (purple) induced prolonged inhibition of OCR in HT29<sup>SQOR KD</sup> cells upon subsequent exposure to 10  $\mu$ M Na<sub>2</sub>S (red arrow). **E,F.** Compared to untreated controls (blue), Na<sub>2</sub>S (50  $\mu$ M, 24 h) pretreatment (purple) did not significantly affect OCR in HT29<sup>Scr</sup> (E) unlike HT29<sup>SQOR KD</sup> (F) cells, following 10  $\mu$ M Na<sub>2</sub>S treatment (red arrow). **G.** Na<sub>2</sub>S (50  $\mu$ M, 24 h) increased recovery time from inhibition by 10  $\mu$ M Na<sub>2</sub>S in HT29<sup>SQOR KD</sup> cells. The data are representative of at least 3 independent experiments or show the mean  $\pm$  SD value (n=3). Two-sample paired *t* test was performed for statistical analysis.

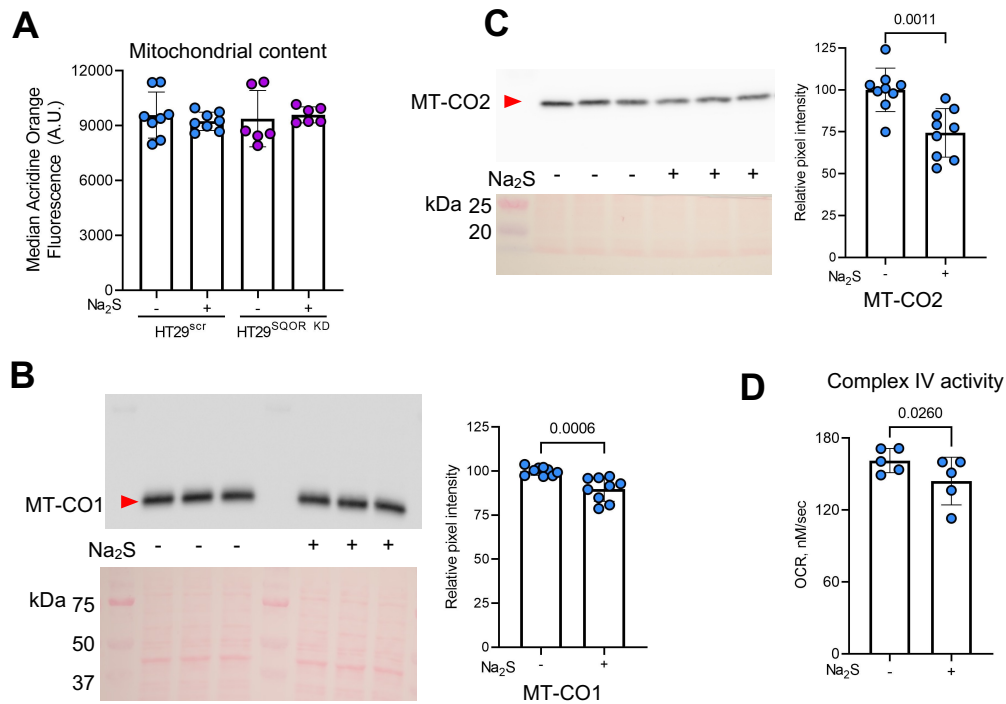

**Figure S3. Sulfide pretreatment leads to changes in complex IV but not total mitochondria.** **A.** Na<sub>2</sub>S treatment (100 μM, 24 h) did not change total mitochondrial content as indicated by cardiolipin levels detected with acridine orange staining. **(B,C)** A small but statistically significant decrease in MT-CO1 (B) and MT-CO2 (C) protein levels (upper panels) was observed in response to sulfide pretreatment (100 μM, 4 h). The loading control (lower panels) represents total protein detected by Ponceau S staining. **D.** Complex IV activity as measured in the TMPD assay at 4 h ± 100 μM Na<sub>2</sub>S treatment, was slightly but statistically significantly lower in pretreated cells. The data are representative of 3 independent experiments (B, C) or represent the mean ± SD of at least 5 independent experiments in the remaining panels. Two-sample unpaired (A-C) and paired (D) *t* test was performed for statistical analysis.

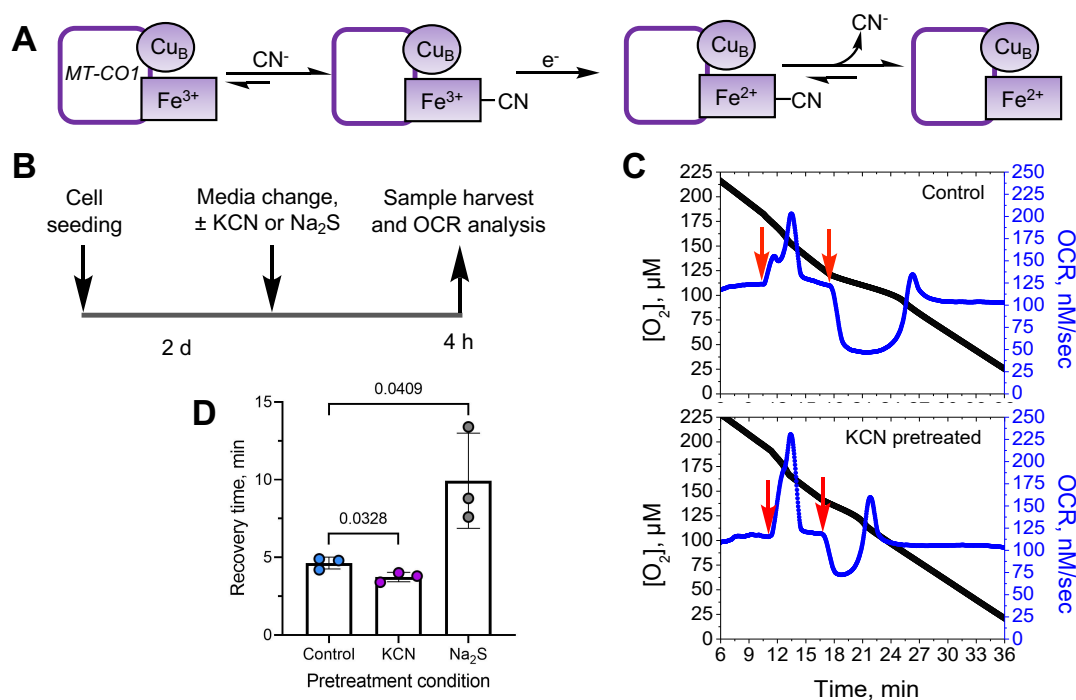

**Figure S4. Acute cyanide exposure does not alter sensitivity to sulfide.** **A.** Scheme depicting cyanide (CN<sup>-</sup>)-dependent inhibition of complex IV by binding to ferric heme a<sub>3</sub> in MT-CO1. **B.** Experimental setup used to compare the effects of sulfide (100 μM, 4 h) or cyanide (500 μM, 4h) pretreatment on mitochondrial function. **C,D.** Potassium cyanide (KCN) pretreatment enhanced sulfide-triggered OCR (red arrows) (C) and the recovery time (D) following 20 μM Na<sub>2</sub>S treatment. The data are representative of at least 3 independent experiments (C), and the mean ± SD from these experiments is shown in D. Two-sample unpaired *t* test was performed for statistical analysis.

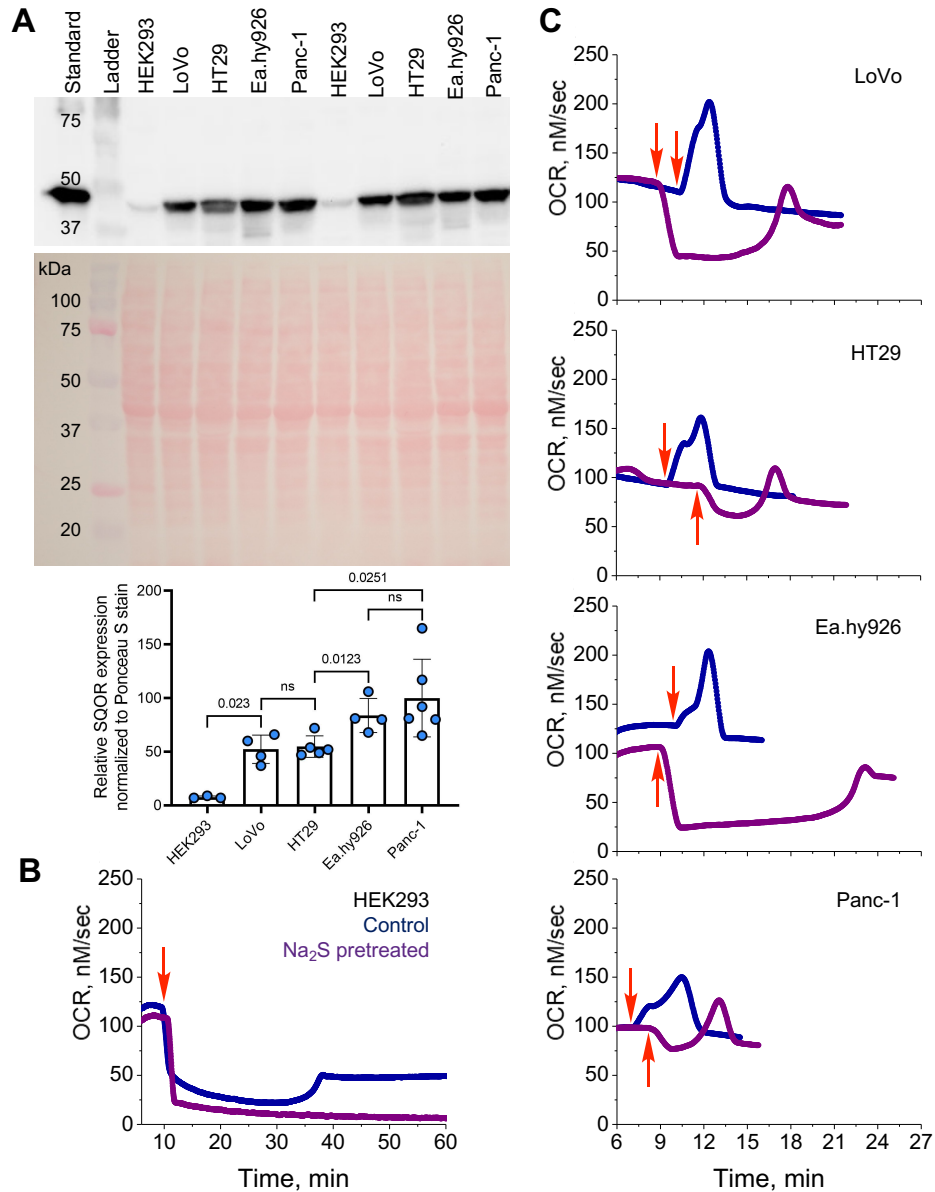

**Figure S5. H<sub>2</sub>S memory correlates with relative SQOR expression in cell lines.** **A.** SQOR was detected in cell lysates (50  $\mu$ g protein/lane) from HEK293, LoVo, HT29, Ea.hy926, and Panc-1 cells by western blot analysis (top). Total protein, detected by Ponceau S stain for equal loading (middle) and semi-quantitative analysis of the blot (bottom) are shown. The data are representative of at least 3 independent experiments per cell line. **B,C.** OCR traces for 4 h control (blue) versus 100  $\mu$ M Na<sub>2</sub>S pretreated (purple) cells following exposure to 20  $\mu$ M sulfide (red arrow). The data in B-C are representative of 3 independent experiments. Unpaired *t* test was performed for statistical analysis.

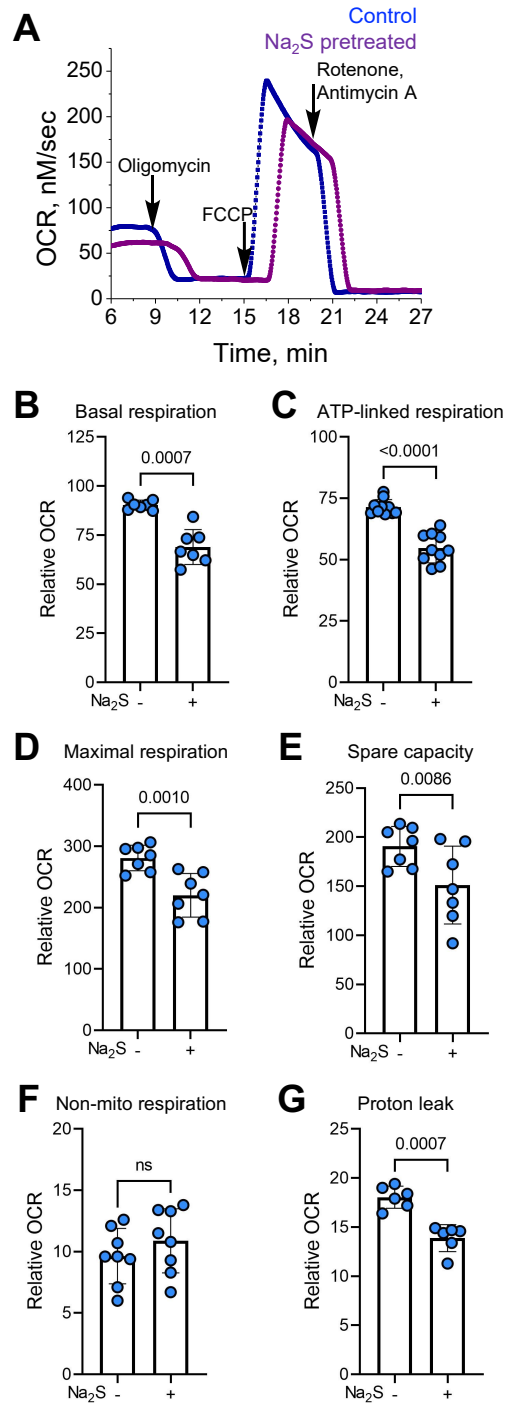

**Figure S6. Acute sulfide treatment alters mitochondrial function.** **A.** Representative traces of the mitochondrial function profile of HT29 cells after 4 h with (purple) or without (blue) 100  $\mu$ M Na<sub>2</sub>S treatment in the presence of the following ETC inhibitors: oligomycin (125 nM), FCCP (125 nM), and rotenone and antimycin A (0.5  $\mu$ M each). **B-G.** Quantitative analysis of the data in A shows the impact of sulfide pretreatment on basal respiration (B), ATP-linked respiration (C), maximal respiration (D), spare capacity (E), non-mitochondrial respiration (F), and the proton leak rate (G). Two-sample paired *t* test was performed for statistical analysis.

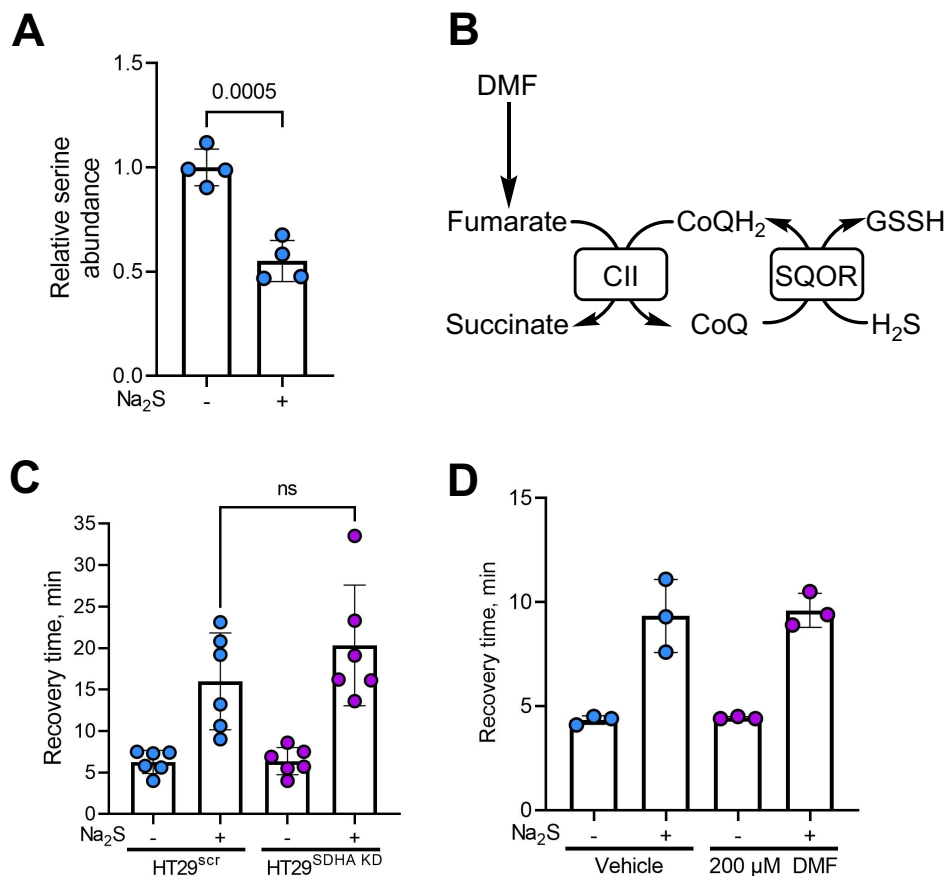

**Figure S7. Sulfide memory is unresponsive to complex II modulation but associated with decreased serine.** **A.** Sulfide (100 μM, 24 h) exposure leads to a drop in serine levels in HT29 cells. **B.** Scheme showing how complex II (CII) reversal and exogenous dimethylfumarate (DMF) can potentially modulate CoQ availability for SQOR. **C,D.** Knockdown of the SDHA subunit of complex II (C) and 200 μM DMF (D) did not affect recovery time in HT29 cells pretreated with 100 μM Na<sub>2</sub>S for 4 h. Data in C-D are representative of at least 3 independent experiments and are the mean ± SD. Two-sample unpaired (A) and paired (C) *t* test was performed for statistical analysis.
